# Supplementary material for: Robust, self-adhesive and anti-bacterial silk-based LIG electrodes for electrophysiological monitoring
Source: Royal Society of Chemistry journal article supplement (doi:10.1039/d3ra05730e), 2023-01-01
Supplement: d3ra05730e1.pdf [file d3ra05730e1.pdf]

## Robust, Self-adhesive and Anti-bacterial Silk-Based LIG Electrodes for Electrophysiological Monitoring

Mohamed K. M. Abd-Elbaki<sup>1</sup>, Tamer Mosaad Ragab<sup>4</sup>, Naglaa R. E. Ismaeel<sup>1\*</sup>, Ahmed S. G. Khalil<sup>2, 3\*</sup>

<sup>1</sup>Zoology Department, Faculty of Science, Fayoum University, 63514 Fayoum, Egypt.

<sup>2</sup>Physics Department, Environmental and Smart Technology Group, Faculty of Science, Fayoum University, 63514 Fayoum, Egypt.

<sup>3</sup>Materials Science and Engineering Department, School of Innovative Design Engineering, Egypt-Japan University of Science and Technology (E-JUST), 179 New Borg El-Arab City, Egypt. <sup>4</sup>Department of Cardiology, Faculty of Medicine, Fayoum University, 63514 Fayoum, Egypt.

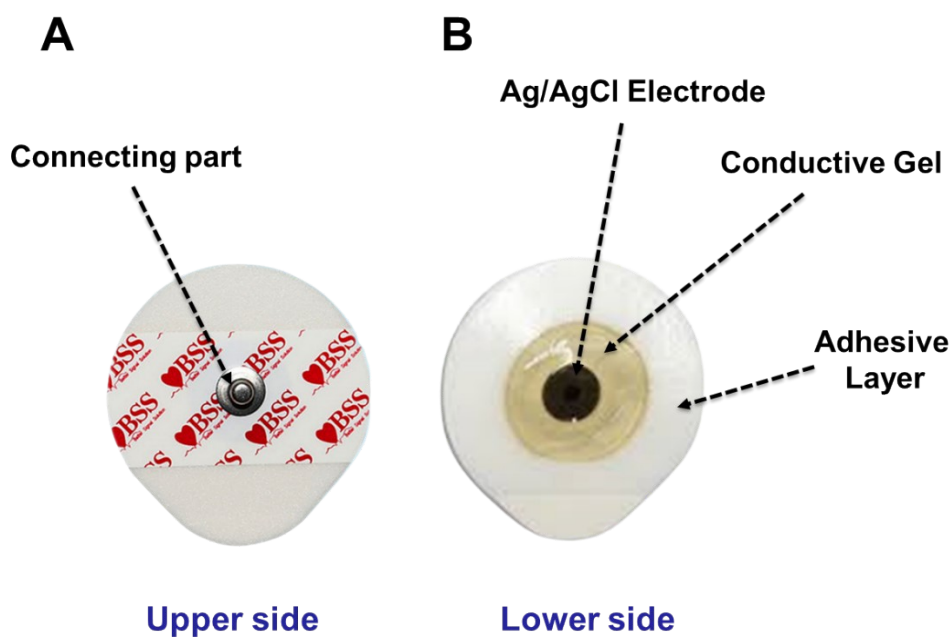

Fig. S1 Composition of commercial Ag/AgCl electrodes. A) upper side and B) Lower side.

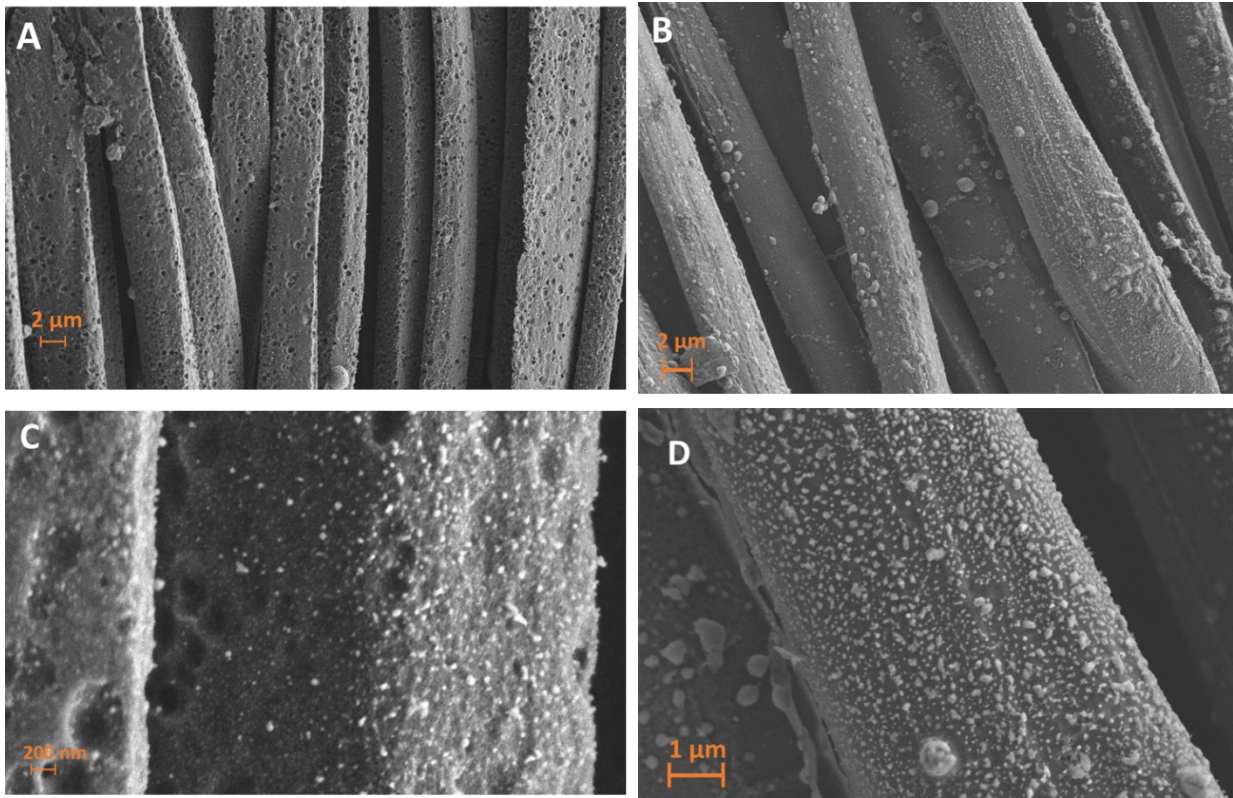

Fig. S2 HR-SEM images (A-B) bundle, (C-D) high magnification single fiber structures of optimized LIG-SF electrodes (2.5 W) and LIG-SF electrodes (1.5 W), respectively.

### Conventional Electrodes

### Conformal Electrodes

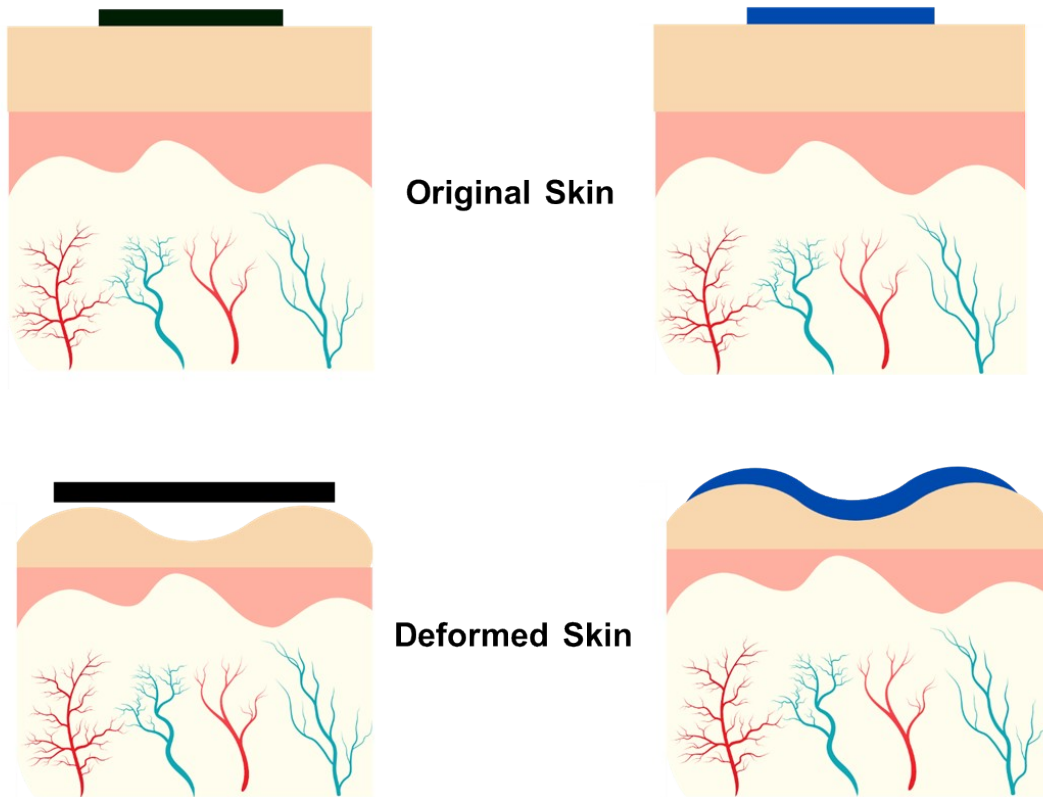

Fig. S3 Conformal property of flexible wearable electrodes in comparison with conventional rigid electrodes.

### a) Adsorption

### b) Mechanical Interlocking

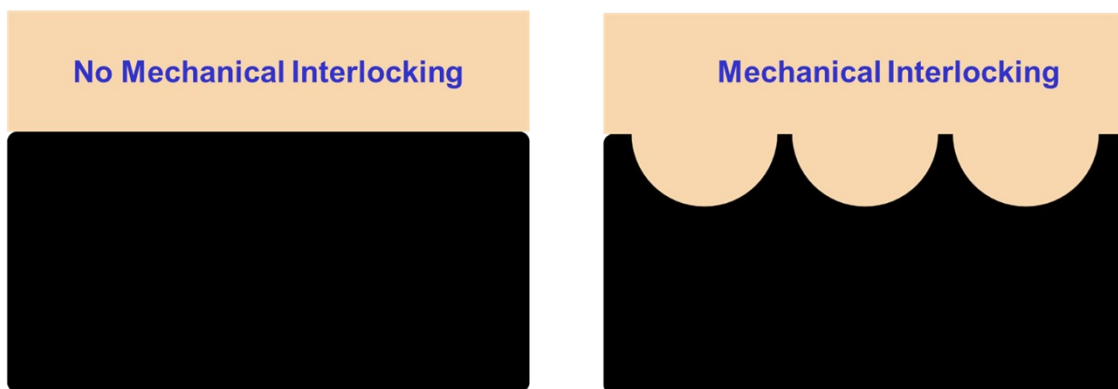

Fig. S4 Adhesion mechanisms of optimized adhesive LIG-SF electrodes. A) Normal adsorption, and B) Mechanical interlocking structure formed by the micro-hole structures.

Table. S1 Sheet resistance ( $\Omega/\text{sq}$ ) of 24 square (Sq) points covering the whole surface of the top side of LIG-SF electrodes.

| <b>Top side of<br/>LIG-SF</b> | <b>Sheet resistance (<math>\Omega/\text{sq}</math>)</b> |               |               |               |               |               |
|-------------------------------|---------------------------------------------------------|---------------|---------------|---------------|---------------|---------------|
|                               | <b>Sq. 1</b>                                            | <b>Sq. 2</b>  | <b>Sq. 3</b>  | <b>Sq. 4</b>  | <b>Sq. 5</b>  | <b>Sq. 6</b>  |
| <b>Sq. 1</b>                  | <b>5.5338</b>                                           | <b>7.8515</b> | <b>6.8977</b> | <b>6.1059</b> | <b>7.6146</b> | <b>8.1027</b> |
| <b>Sq. 2</b>                  | <b>6.9649</b>                                           | <b>6.8409</b> | <b>4.6589</b> | <b>6.0026</b> | <b>7.1467</b> | <b>7.2682</b> |
| <b>Sq. 3</b>                  | <b>6.9846</b>                                           | <b>6.7164</b> | <b>5.6124</b> | <b>5.0235</b> | <b>6.6086</b> | <b>8.3167</b> |
| <b>Sq. 4</b>                  | <b>6.7169</b>                                           | <b>6.6649</b> | <b>5.2029</b> | <b>6.3521</b> | <b>7.1319</b> | <b>6.7924</b> |

Table. S2 Sheet resistance ( $\Omega/\text{sq}$ ) of 24 square (Sq) points covering the whole surface of the bottom side of LIG-SF electrodes.

| <b>Bottom side<br/>of LIG-SF</b> | <b>Sheet resistance (<math>\Omega/\text{sq}</math>)</b> |               |               |               |               |               |
|----------------------------------|---------------------------------------------------------|---------------|---------------|---------------|---------------|---------------|
|                                  | <b>Sq. 1</b>                                            | <b>Sq. 2</b>  | <b>Sq. 3</b>  | <b>Sq. 4</b>  | <b>Sq. 5</b>  | <b>Sq. 6</b>  |
| <b>Sq. 1</b>                     | <b>5.1948</b>                                           | <b>7.6721</b> | <b>8.1931</b> | <b>6.5321</b> | <b>7.2133</b> | <b>8.1923</b> |
| <b>Sq. 2</b>                     | <b>6.7363</b>                                           | <b>6.1622</b> | <b>7.71</b>   | <b>7.2189</b> | <b>7.5295</b> | <b>7.1444</b> |
| <b>Sq. 3</b>                     | <b>6.4908</b>                                           | <b>8.041</b>  | <b>7.4906</b> | <b>6.4524</b> | <b>6.1607</b> | <b>7.3409</b> |
| <b>Sq. 4</b>                     | <b>7.3081</b>                                           | <b>5.6484</b> | <b>7.1803</b> | <b>5.778</b>  | <b>8.154</b>  | <b>8.2316</b> |
